# Supplementary material for: Outcomes after cytoreductive radical prostatectomy for de novo metastatic hormone-sensitive prostate cancer: survival and time to treatment intensification in a retrospective cohort
Source: Research Square preprint supplement (doi:10.21203/rs.3.rs-7696870/v1), 2025-10-15
Supplement: Supplementary file 1 [file 76b03be0d151a766abb28ab0.docx]

# Supplementary Figure Legends

## Supplementary Figure S1. Patient selection flowchart. Newly diagnosed prostate cancer cases (2014–2022) at Tungs’ Taichung MetroHarbor Hospital were screened. Inclusion: synchronous metastasis at diagnosis, age 18–80 years, histologically confirmed adenocarcinoma, no prior therapy, and baseline staging with CT and bone scan. Exclusion: metachronous metastasis, receipt of prostate radiotherapy, no treatment after diagnosis, death during index hospitalization, no post-treatment PSA follow-up, follow-up <6 months, or no imaging at PSA progression. The final eligible cohort proceeded to group assignment (CRP vs non-CRP) and subsequent analyses.

## Abbreviations: CRP, cytoreductive radical prostatectomy; PSA, prostate-specific antigen; RT, radiotherapy; CT, computed tomography.

## Figure S2. Love plot of covariate balance before and after propensity-score matching (PSM).

## Absolute standardized mean differences (SMDs) are shown for prespecified baseline covariates before matching (unmatched) and after 1:2 nearest-neighbor PSM with caliper 0.1 on the logit of the propensity score. The vertical dashed line marks |SMD| = 0.10. Matching approach and covariates are detailed in Methods; balance summary corresponds to Supplementary Table S1.

## Supplementary Figure S3. Propensity-score distributions before and after matching.

## Kernel density plots show the overlap of propensity scores for CRP vs non-CRP in the unmatched sample and the improved common support after PSM. Adequate overlap supports the matched-cohort KM and Cox analyses.

## Supplementary Figure S4. Forest plot of hazard ratios comparing CRP vs non-CRP across endpoints.

## Points and horizontal bars show hazard ratios (HRs) with 95% confidence intervals (CIs) from Cox models for overall survival (OS), cancer-specific survival (CSS), no-intensification survival (time to TI with deaths censored), and post-intensification progression-free survival (intensification-PFS). The red vertical line denotes HR = 1 (no difference). Numerical HRs are displayed on the right; model details are in Methods and main results.

## Supplementary Figure S5. Swimmer plot of systemic therapy trajectories and timing of treatment intensification.

## Individual patient timelines (months from diagnosis) display the sequence and duration of systemic therapies. Symbols indicate key events: CRP, start of treatment intensification (TI), radiologic/biochemical progression or failure, and death. Panels are stratified by treatment group (Non-CRP vs CRP). Colors denote major systemic regimens used in the cohort.

## Abbreviations: ADT, androgen-deprivation therapy; ARPI, androgen-receptor pathway inhibitor; CRP, cytoreductive radical prostatectomy; TI, treatment intensification; Ra-223, radium-223.
